# Supplementary material for: Susceptibility and resistance profiles of field and laboratory strains of Trogoderma granarium Everts to pirimiphos-methyl, alpha-cypermethrin and spinetoram
Source: PeerJ. 2025 May 13;13:e19423. doi: 10.7717/peerj.19423 (PMC12083465; doi:10.7717/peerj.19423)
Supplement: Supplemental Information 1 — Bioassay data of chlorpyrifos-methyl, alpha-cypermethrin and spinetoram against different laboratory and field strains of T. granarium. [file peerj-13-19423-s001.xlsx]

## Sheet: Sheet1
		Lab					LHR					MBD						RPR					RYK						NWL					HBD						GRW
	Pirimiphos-methyl	Conc #	Exp	Response	Response with PBO	Response with DEF	Conc #	Exp	Response	Response with PBO	Response with DEF	Conc #	Exp	Response	Response with PBO	Response with DEF		Conc #	Exp	Response	Response with PBO	Response with DEF	Conc #	Exp	Response	Response with PBO	Response with DEF		Conc #	Exp	Response	Response with PBO	Response with DEF	Conc #	Exp	Response	Response with PBO	Response with DEF		Conc #	Exp	Response	Response with PBO	Response with DEF
		1	60	4	5	4	1	60	4	6	7	1	60	8	10	11		1	60	3	6	8	1	60	4	9	6		1	60	8	12	15	1	60	3	9	10		1	60	3	9	6
		2	60	9	10	7	2	60	7	12	10	2	60	11	16	14		2	60	6	12	12	2	60	6	15	10		2	60	13	18	20	2	60	5	18	15		2	60	6	15	9
		3	60	25	22	20	3	60	12	24	25	3	60	22	28	31		3	60	15	18	20	3	60	13	25	30		3	60	20	29	30	3	60	9	25	28		3	60	16	28	20
		4	60	40	42	45	4	60	35	40	45	4	60	33	40	43		4	60	28	39	35	4	60	23	35	40		4	60	35	43	50	4	60	23	45	39		4	60	26	50	43
		5	60	53	55	55	5	60	45	52	55	5	60	44	50	54		5	60	38	51	48	5	60	40	51	50		5	60	43	53	55	5	60	40	51	51		5	60	36	57	53
		6	60	59	59	59	6	60	50	59	58	6	60	50	58	59		6	60	48	54	57	6	60	45	59	58		6	60	51	59	60	6	60	47	56	59		6	60	40	60	59
		Control	60	0	0	0	Control	60	0	0	0	Control	60	0	0	0		Control	60	0	0	0	Control	60	1	0	1		Control	60	2	0	0	Control	60	1	0	0		Control	60	1	1	0
		Lab					LHR					MBD						RPR					RYK						NWL					HBD						GRW
	Alpha-cypermethrin	Conc #	Exp	Response	Response with PBO	Response with DEF	Conc #	Exp	Response	Response with PBO	Response with DEF	Conc #	Exp	Response	Response with PBO	Response with DEF		Conc #	Exp	Response	Response with PBO	Response with DEF	Conc #	Exp	Response	Response with PBO	Response with DEF		Conc #	Exp	Response	Response with PBO	Response with DEF	Conc #	Exp	Response	Response with PBO	Response with DEF		Conc #	Exp	Response	Response with PBO	Response with DEF
		1	60	8	6	8	1	60	5	8	4	1	60	2	5	3		1	60	10	6	10	1	60	5	10	7		1	60	4	7	8	1	60	3	8	10		1	60	8	5	10
		2	60	14	10	12	2	60	10	12	8	2	60	8	8	6		2	60	17	14	15	2	60	7	12	9		2	60	9	10	11	2	60	8	10	12		2	60	11	9	13
		3	60	33	30	30	3	60	15	18	17	3	60	20	16	14		3	60	27	28	25	3	60	12	17	18		3	60	16	20	16	3	60	20	17	16		3	60	22	27	20
		4	60	48	50	51	4	60	25	30	26	4	60	33	30	28		4	60	47	44	50	4	60	24	25	30		4	60	28	35	29	4	60	33	35	32		4	60	32	37	36
		5	60	54	54	57	5	60	37	35	40	5	60	43	48	45		5	60	53	55	53	5	60	38	34	39		5	60	48	50	45	5	60	45	45	48		5	60	42	47	46
		6	60	59	58	59	6	60	52	48	50	6	60	54	53	58		6	60	58	59	58	6	60	50	45	55		6	60	55	57	55	6	60	55	57	59		6	60	52	54	55
		Control	60	1	0	0	Control	60	1	0	0	Control	60	0	0	1		Control	60	1	0	0	Control	60	0	0	0		Control	60	1	2	2	Control	60	0	1	0		Control	60	1	0	0
		Lab					LHR					MBD						RPR					RYK						NWL					HBD						GRW
	Spinetoram	Conc #	Exp	Response	Response with PBO	Response with DEF	Conc #	Exp	Response	Response with PBO	Response with DEF	Conc #	Exp	Response	Response with PBO	Response with DEF		Conc #	Exp	Response	Response with PBO	Response with DEF	Conc #	Exp	Response	Response with PBO	Response with DEF		Conc #	Exp	Response	Response with PBO	Response with DEF	Conc #	Exp	Response	Response with PBO	Response with DEF		Conc #	Exp	Response	Response with PBO	Response with DEF
		1	60	12	8	13	1	60	4	10	6	1	60	8	10	12		1	60	6	8	9	1	60	12	10	8		1	60	3	7	9	1	60	2	5	2		1	60	2	4	5
		2	60	16	16	18	2	60	6	15	9	2	60	11	13	15		2	60	9	15	12	2	60	15	18	16		2	60	5	10	15	2	60	4	10	4		2	60	5	7	8
		3	60	39	35	35	3	60	10	20	18	3	60	18	22	20		3	60	22	24	20	3	60	25	30	29		3	60	12	17	20	3	60	8	17	10		3	60	13	15	13
		4	60	49	50	45	4	60	30	38	28	4	60	40	39	45		4	60	40	36	45	4	60	35	38	40		4	60	22	34	30	4	60	20	30	30		4	60	39	35	33
		5	60	53	55	55	5	60	43	48	41	5	60	46	49	50		5	60	48	45	55	5	60	45	48	50		5	60	50	45	45	5	60	35	40	45		5	60	46	48	49
		6	60	59	59	59	6	60	50	58	55	6	60	54	59	59		6	60	56	59	59	6	60	50	57	59		6	60	57	57	59	6	60	40	50	55		6	60	50	55	58
		Control	60	1	0	2	Control	60	0	1	0	Control	60	0	0	2		Control	60	1	1	1	Control	60	0	0	0		Control	60	0	1	0	Control	60	1	0	0		Control	60	1	2	0
